# Supplementary material for: Micrometer-sized dihydrogenphosphate-intercalated layered double hydroxides: synthesis, selective infrared absorption properties, and applications as agricultural films
Source: Royal Society of Chemistry journal article supplement (doi:10.1039/c7dt03483k), 2017-12-22
Supplement: c7dt03483k1.pdf [file c7dt03483k1.pdf]

## Supporting Information

Micrometer-Sized Dihydrogenphosphate-Intercalated Layered Double Hydroxides: Synthesis, Selective Infrared Absorption Properties, and Applications in Agricultural Film

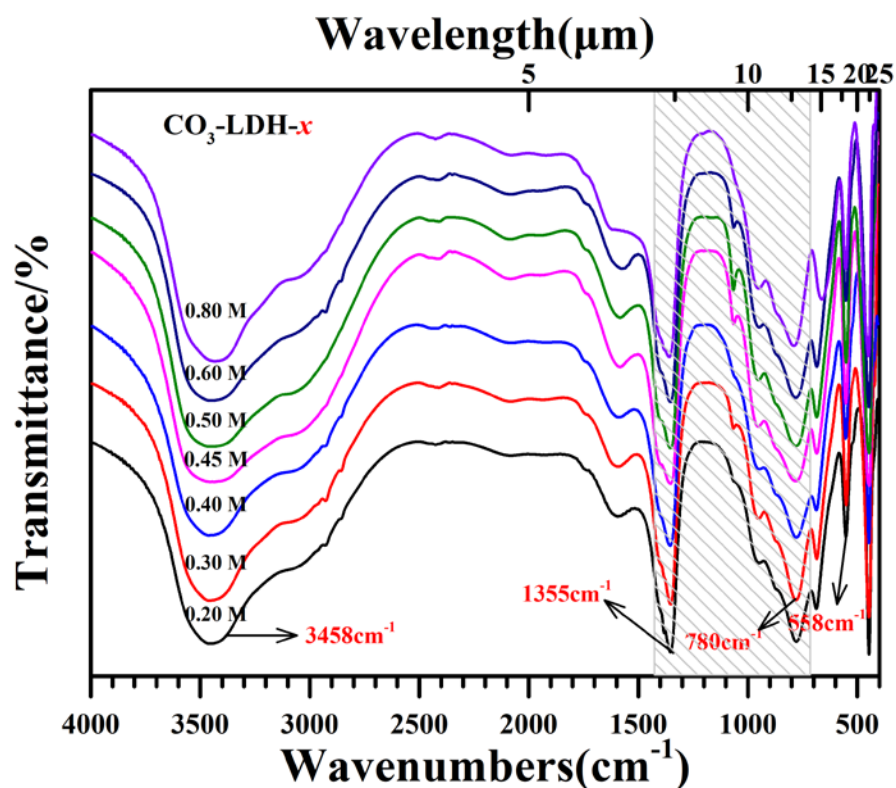

Figure S1. FT-IR spectra of  $\text{CO}_3\text{-LDH-x}$  samples with different  $\text{Mg}^{2+}$  concentration.

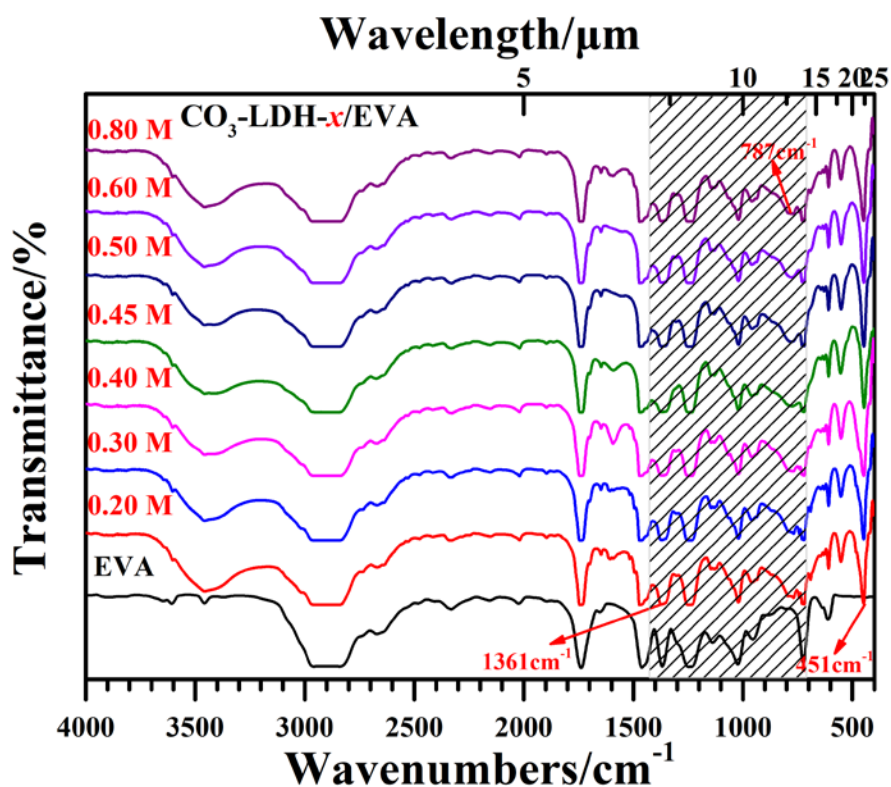

Figure S2. FT-IR spectra of  $\text{CO}_3\text{-LDH-x/EVA}$  samples with different  $\text{Mg}^{2+}$  concentration.

Table S1. Chemical compositions (%) of MgAl-H<sub>2</sub>PO<sub>4</sub>-LDH samples

| Samples                                    | Mg (ppm) | Al (ppm) | P (ppm) | Formula*                                                                                                                        | M (g/mol) | P content (%) |
|--------------------------------------------|----------|----------|---------|---------------------------------------------------------------------------------------------------------------------------------|-----------|---------------|
| H <sub>2</sub> PO <sub>4</sub> -LDH-0.20 M | 91.13    | 50.89    | 58.55   | Mg <sub>0.66</sub> Al <sub>0.33</sub> (OH) <sub>2</sub> (H <sub>2</sub> PO <sub>4</sub> ) <sub>0.33</sub> •0.67H <sub>2</sub> O | 102.86    | 9.95          |
| H <sub>2</sub> PO <sub>4</sub> -LDH-0.30 M | 85.78    | 47.19    | 52.97   | Mg <sub>0.67</sub> Al <sub>0.33</sub> (OH) <sub>2</sub> (H <sub>2</sub> PO <sub>4</sub> ) <sub>0.32</sub> •0.67H <sub>2</sub> O | 102.09    | 9.72          |
| H <sub>2</sub> PO <sub>4</sub> -LDH-0.40 M | 72.47    | 41.24    | 51.09   | Mg <sub>0.65</sub> Al <sub>0.33</sub> (OH) <sub>2</sub> (H <sub>2</sub> PO <sub>4</sub> ) <sub>0.36</sub> •0.67H <sub>2</sub> O | 105.49    | 10.58         |
| H <sub>2</sub> PO <sub>4</sub> -LDH-0.45 M | 81.65    | 44.40    | 50.22   | Mg <sub>0.68</sub> Al <sub>0.33</sub> (OH) <sub>2</sub> (H <sub>2</sub> PO <sub>4</sub> ) <sub>0.33</sub> •0.67H <sub>2</sub> O | 103.30    | 9.90          |
| H <sub>2</sub> PO <sub>4</sub> -LDH-0.50 M | 87.25    | 46.99    | 53.29   | Mg <sub>0.69</sub> Al <sub>0.33</sub> (OH) <sub>2</sub> (H <sub>2</sub> PO <sub>4</sub> ) <sub>0.33</sub> •0.67H <sub>2</sub> O | 103.54    | 9.88          |
| H <sub>2</sub> PO <sub>4</sub> -LDH-0.60 M | 83.91    | 46.46    | 54.63   | Mg <sub>0.67</sub> Al <sub>0.33</sub> (OH) <sub>2</sub> (H <sub>2</sub> PO <sub>4</sub> ) <sub>0.34</sub> •0.67H <sub>2</sub> O | 104.03    | 10.13         |
| H <sub>2</sub> PO <sub>4</sub> -LDH-0.80 M | 76.01    | 43.65    | 52.43   | Mg <sub>0.65</sub> Al <sub>0.33</sub> (OH) <sub>2</sub> (H <sub>2</sub> PO <sub>4</sub> ) <sub>0.35</sub> •0.67H <sub>2</sub> O | 104.52    | 10.38         |

\*The amount of water was determined by TG-DTA.
